# Supplementary material for: Intercepting Functions for Memoization
Source: Atypon-hosted journal article supplement (doi:10.1145/2751559), 2015-06-24
Supplement: taco1202-18.pdf [file 2751559&file=taco1202-18.pdf]

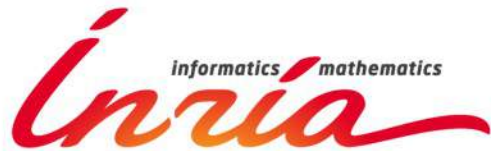

# Intercepting Functions for Memoization

## A case study using transcendental functions

Arjun Suresh, Bharath Narasimha Swamy,  
Erven Rohou, André Seznec

HiPEAC Conference, Prague, Jan 2016

# Motivation

## Function arguments repeat often

- Not necessarily poorly written or un-optimized code
- Example
  - calls to libm/j0 from ATMI Goh
  - total of 21.9M calls
  - 216k unique arguments

| Size of sliding window | Captures |
|------------------------|----------|
| 4 k                    | 8 %      |
| 16 k                   | 13 %     |
| 64 k                   | 28 %     |
| 256 k                  | 100 %    |

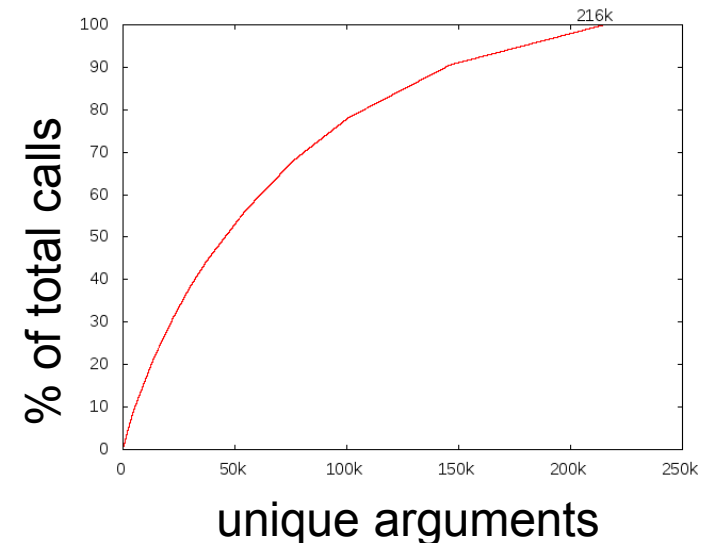

# Opportunity: cache results

- Store tuples (`args`, `value`) in table
- managed as a cache
- Lookup table before calling again
- Trade CPU time for storage

```
float fun(arg)
{
  index = hash(arg)
  if (table[index][0] ≠ arg) {
    table[index][0] = arg
    table[index][1] = original_fun(arg)
  }
  return table[index][1]
}
```

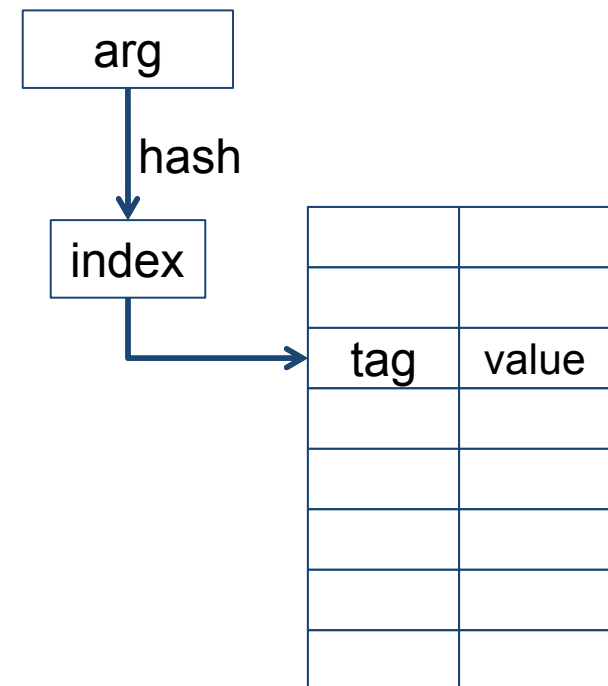

# Condition: pure functions

- Pure function
  - returns the same result for the same input
  - no side-effect

# Savings

```
float fun(arg)
{
  index = hash(arg)
  if (table[index][0] ≠ arg) {
    table[index][0] = arg
    table[index][1] = original_fun(arg)
  }
  return table[index][1]
}
```

miss {

- Assume
  - $T_f$ : execution time of function
  - $t_h$ : time to retrieve data in table (hit)
  - $t_{mo}$ : overhead in case of miss
  - $H$ : fraction of hits

- We want:

$$H \times t_h + (1 - H)(T_f + t_{mo}) < T_f$$

hits                      misses

- We need:

$$H > \frac{t_{mo}}{T_f + t_{mo} - t_h}$$

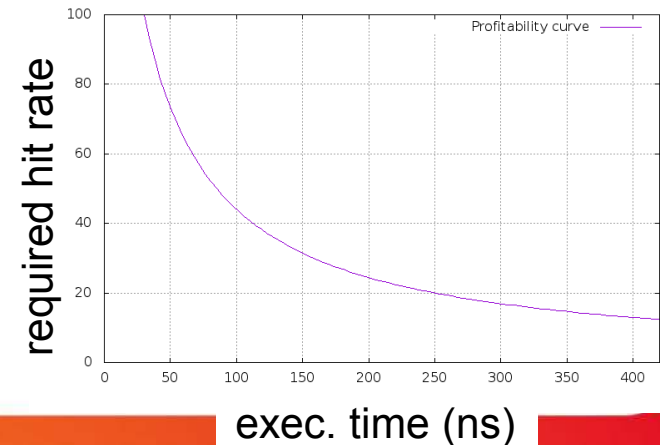

# Implementation

- Hash function
- Select pure functions
  - focus on the math library `libm.so`
- Intercept library functions
  - rely on operating system mechanism `LD_PRELOAD`

# Hashing

- Must be fast
- Simple XOR-ing
  - 6 SSE instructions
  - few collisions (good enough)
- For smaller indices, mask higher bits
- For multiple arguments, first XOR arguments

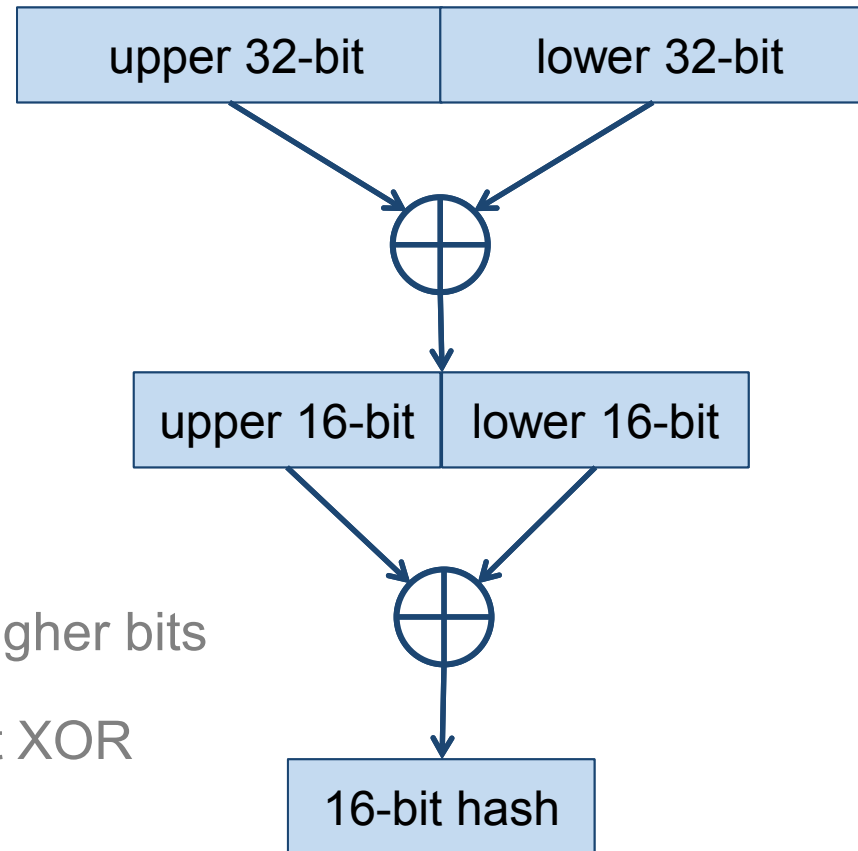

# Pure functions: `libm.so`

- Standard math library on UNIX/Linux

Data on Intel Ivy Bridge, 2 GHz, GNU libm 2.2

| function | hit time (ns) | miss overhead (ns) | exec time (ns) | hits needed |
|----------|---------------|--------------------|----------------|-------------|
| exp      | 30            | 55                 | 90             | 48 %        |
| log      |               |                    | 92             | 47%         |
| sin      |               |                    | 110            | 41 %        |
| cos      |               |                    | 123            | 37 %        |
| j0       |               |                    | 395            | 13 %        |
| j1       |               |                    | 325            | 16 %        |
| pow      |               |                    | 180            | 27 %        |
| sincos   |               |                    | 236            | 21 %        |

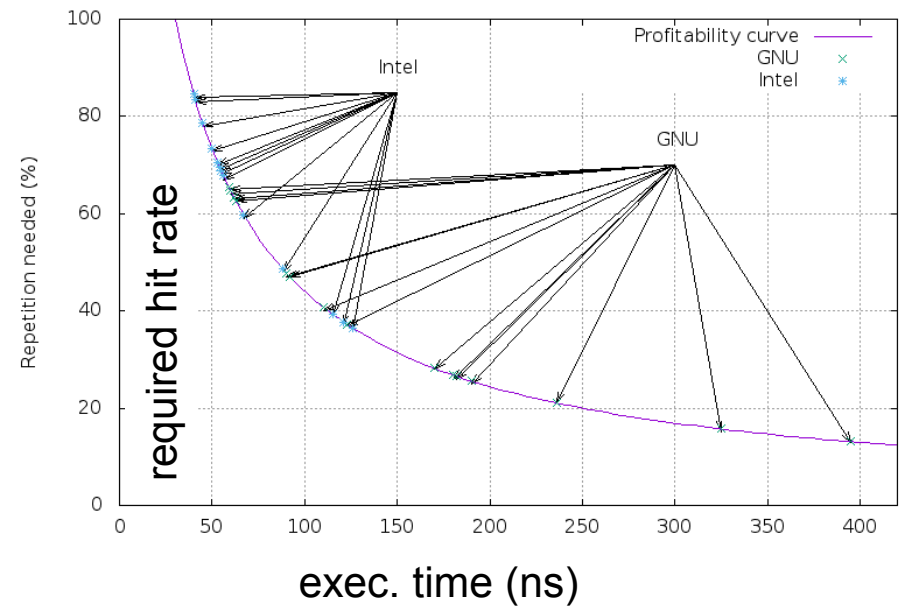



# Intercepting function calls

- Rely on OS feature
  - just set `LD_PRELOAD` env. variable
  - specify shared libraries to be loaded before others
  - handled by dynamic loader
- No recompilation, no source needed

```
% export LD_PRELOAD=/path/to/mylib.so  
% ./benchmark
```

# Experimental Setup

- Linux 3.11
- Intel Ivy Bridge, 2 GHz
- GCC 4.8, `libm` 2.2
- Intel `icc` 9
- ARM Cortex-A9, 1.2 GHz
- GCC 4.7, `libm` 2.2
- Benchmarks
  - SPEC CPU 2006
  - SPEC OMP 2001
  - Splash 2x PARSEC
  - Barsky
  - ATMI
    - processor temperature
  - Population dynamics
    - convection-diffusion-reaction equations

# Results

- SPEC speedups +1% – +24%
- ATMI: +27%
  - extensive use of Bessel functions  
 $j_0$  and  $j_1$
- Population dynamics: +52%
  - $\exp$ ,  $\log$
- Outstanding: bwaves

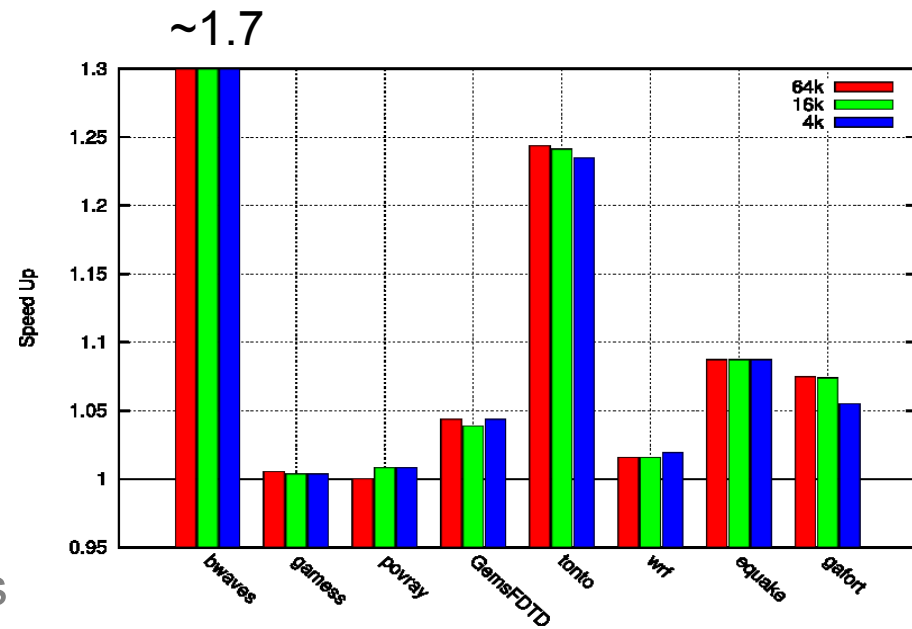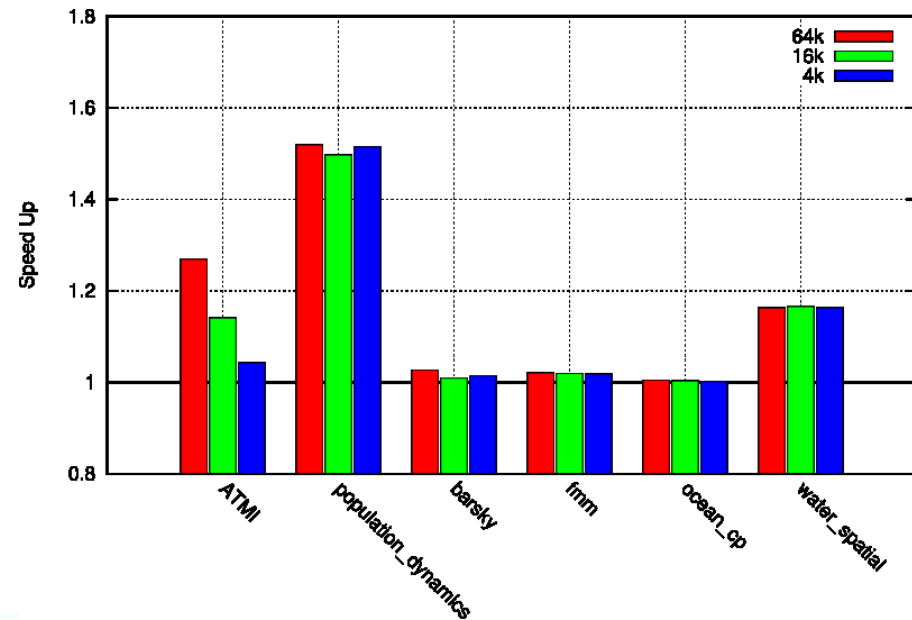

# “Fixing” Performance bug

- `pow()` 10,000x too slow for some input values
  - bug known since 2012
  - [https://sourceware.org/bugzilla/show\\_bug.cgi?id=13932](https://sourceware.org/bugzilla/show_bug.cgi?id=13932)
- In bwaves, we experience 1000x
  - for  $0.75^{1.000\dots}$
- Memoization nicely covers for the extra latency
  - 1.7x speedup overall

# Rounding modes

- Math functions are not, strictly speaking, pure
  - results depend on rounding modes
- Rounding modes are set by a function call
  - `fesetround()`
- Intercept, flush tables

# Automatic Disabling

- Possible performance degradation, due to
  - lookup overhead ( $t_{mo}$ )
  - poor argument locality
- Helper thread monitors hit rate
- Can disable memoization
  - change the address of the function in the GOT (Global Offset Table)
- Can restore later, to account for program phases

# Summary

- Function arguments repeat often
- Memoization is an effective way to improve performance
- Transparent approach for the user

# Future Work

- Compile-time detection of pure functions
  - automatic analysis
  - memoize user code
  - wrapper inlining
- Hardware support
  - specialized `call` instruction
  - lowers profitability threshold





# Associativity

- Only beneficial for Bessel functions in ATMI

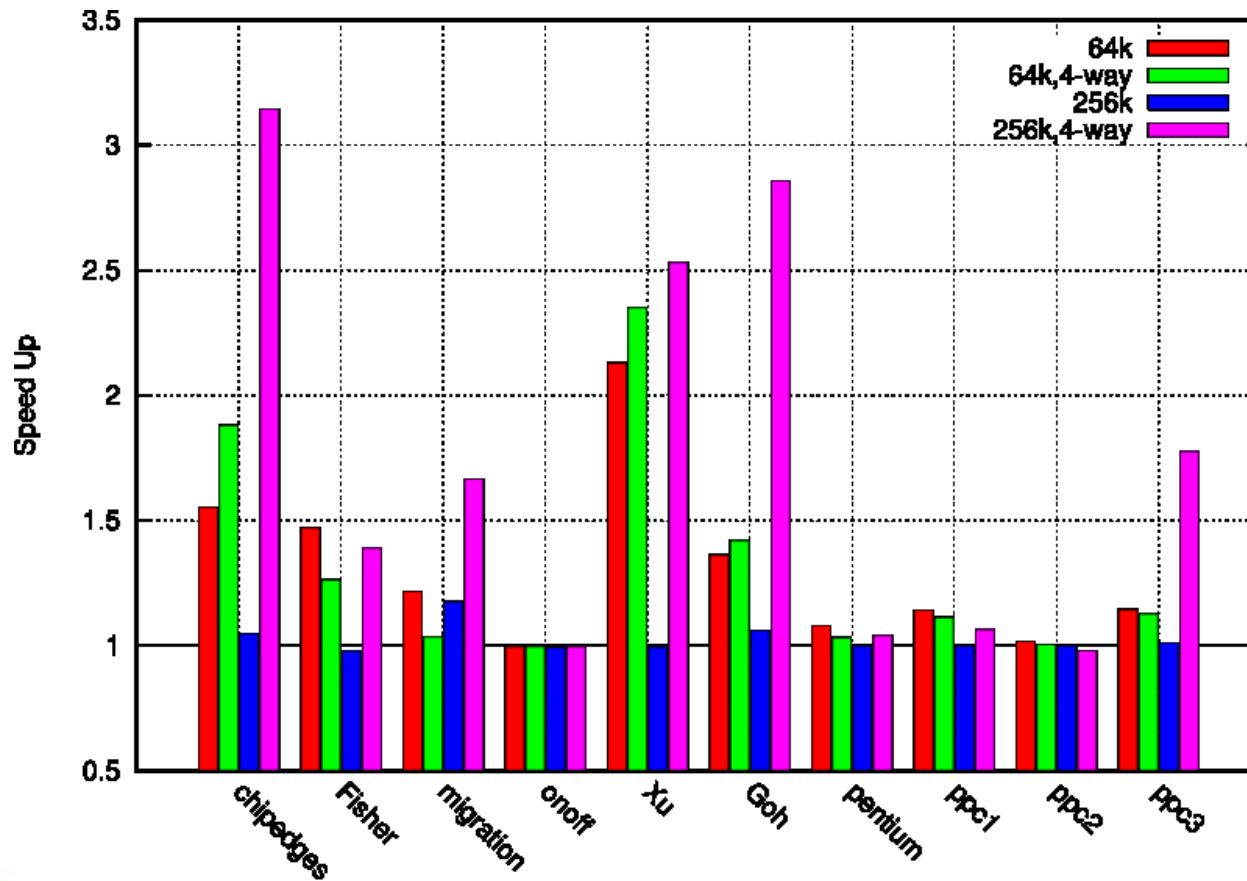

# LD\_PRELOAD

- Indirect calls to DLLs
- Actual address resolved by loader at run-time
- GOT (Global Offset Table)

```
x=sin(a);
```

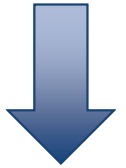

```
mov ...,xmm0  
call sin@plt
```

```
sin@plt:  
  jmpq *0x200a62(rip)
```

```
GOT:  
  ...  
  @ of sin
```

```
libc.so  
double sin(double a) {  
}
```

```
mylib.so  
double sin(double a) {  
  ...  
  call real sin()  
}
```
